# Supplementary material for: Diabetic Retinopathy Classification using VisionTransformer Architectures and Deep Learning
Source: Research Square preprint supplement (doi:10.21203/rs.3.rs-3261198/v1), 2023-08-24
Supplement: Supplementary file 1 [file 92c860ae264370e96c26b069.docx]

Supplementary material

The datasets generated and/or analysed during the current study are available in the [diabetic-retinopathy-dataset] repository, [www.kaggle.com/datasets/sachinkumar413/diabetic-retinopathy-dataset. 2022.

]
